# Supplementary material for: Sandwich-structured Fe2O3@SiO2@Au nanoparticles with magnetoplasmonic responses
Source: Royal Society of Chemistry journal article supplement (doi:10.1039/c5tc01259g), 2015-01-01
Supplement: c5tc01259g1.pdf [file c5tc01259g1.pdf]

Cite this: DOI: 10.1039/c0xx00000x

www.rsc.org/xxxxxx

ARTICLE TYPE

## Sandwich-structured $\text{Fe}_2\text{O}_3@\text{SiO}_2@\text{Au}$ nanoparticles with magnetoplasmonic responses

Zhongyu Cai,<sup>a,b\*</sup> Eunice S. P. Leong,<sup>c</sup> Zhigang Wang,<sup>a</sup> Wenxin Niu,<sup>a</sup> Weiqing Zhang,<sup>a</sup> Serge Ravaine,<sup>d</sup>  
5 Nikolai L. Yakovlev,<sup>c</sup> Yan Jun Liu,<sup>c\*</sup> Jinghua Teng,<sup>c\*</sup> Xianmao Lu<sup>a\*</sup>

Received (in XXX, XXX) Xth XXXXXXXXX 20XX, Accepted Xth XXXXXXXXX 20XX

DOI: 10.1039/b000000x

Electronic Supplementary material

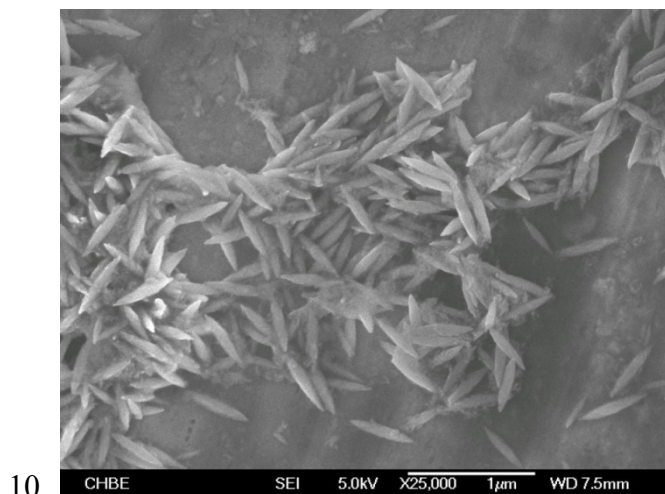

**Fig. S1** SEM image of relatively monodisperse  $\alpha\text{-Fe}_2\text{O}_3$  NPs with an aspect ratio of 6 fabricated via the forced hydrolysis method.

15 Table S1. The average size and size distribution of  $\alpha\text{-Fe}_2\text{O}_3$  NPs

| Aspect ratio | R( $\sigma$ ) | Length ( $\sigma$ ) (nm) | Polydispersity of Length (%) | Width( $\sigma$ ) (nm) | Polydispersity of Width (%) |
|--------------|---------------|--------------------------|------------------------------|------------------------|-----------------------------|
| 3            |               | 178.5 (3.2)              | 1.8%                         | 59.3 (2.9)             | 4.9%                        |
| 4            |               | 192.4 (3.9)              | 2.0%                         | 48.8 (2.1)             | 4.3%                        |
| 6            |               | 218.1(4.0)               | 1.8%                         | 36.6 (2.2)             | 6%                          |
| 9            |               | 270.1 (10.0)             | 3.7%                         | 30.0 (1.4)             | 4.7%                        |

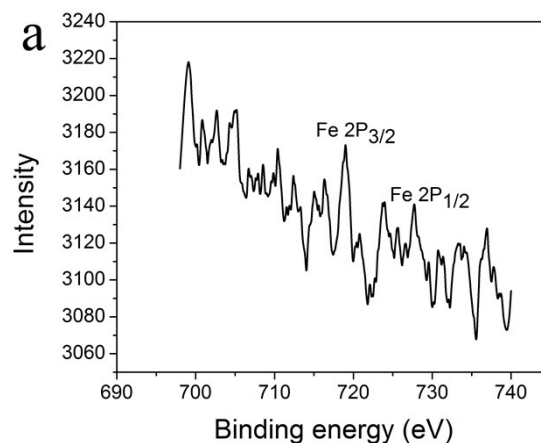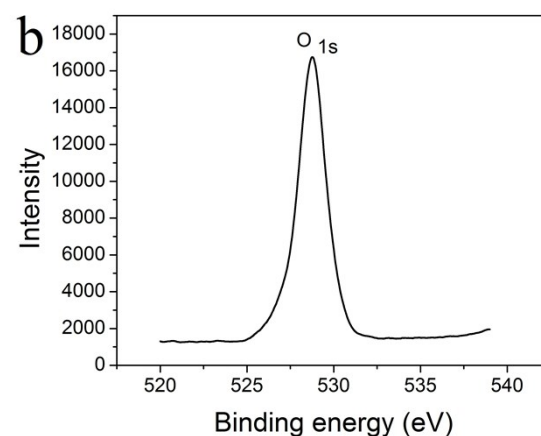

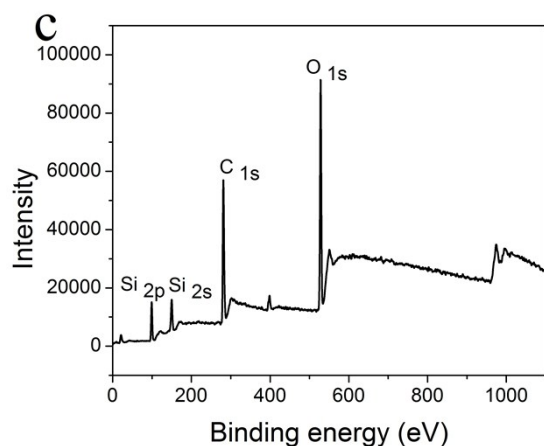

**Fig. S2** XPS spectra of  $\alpha$ -Fe<sub>2</sub>O<sub>3</sub>@SiO<sub>2</sub> NPs: (a) Fe 2p, (b) O 1s and (c) survey scan. The  $\alpha$ -Fe<sub>2</sub>O<sub>3</sub>@SiO<sub>2</sub> NPs shows relatively weak Fe 2p<sub>1/2</sub> and 2p<sub>3/2</sub> peaks (Figure S2a). This is caused by the coating of SiO<sub>2</sub> on the surface of  $\alpha$ -Fe<sub>2</sub>O<sub>3</sub> NPs. The XPS spectra confirmed the existence of Fe<sub>2</sub>O<sub>3</sub>@SiO<sub>2</sub>.

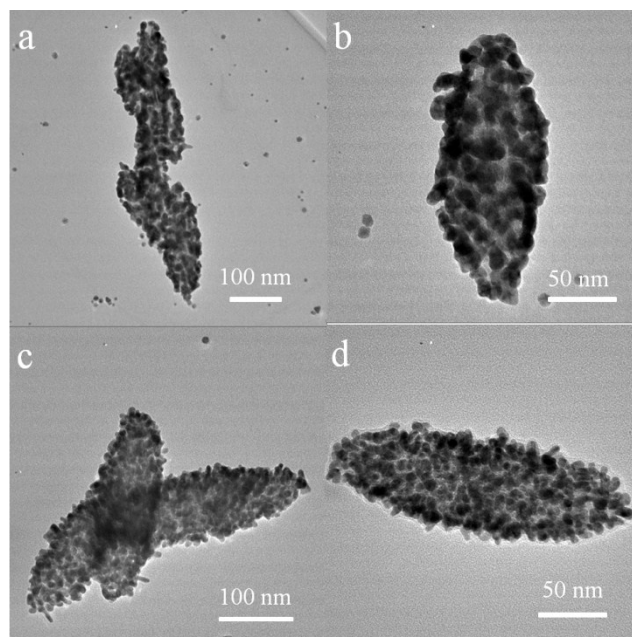

**Fig. S4** TEM images of Fe<sub>2</sub>O<sub>3</sub>@Au NPs with aspect ratios (a-b) 3 and (c-d) 4, respectively.

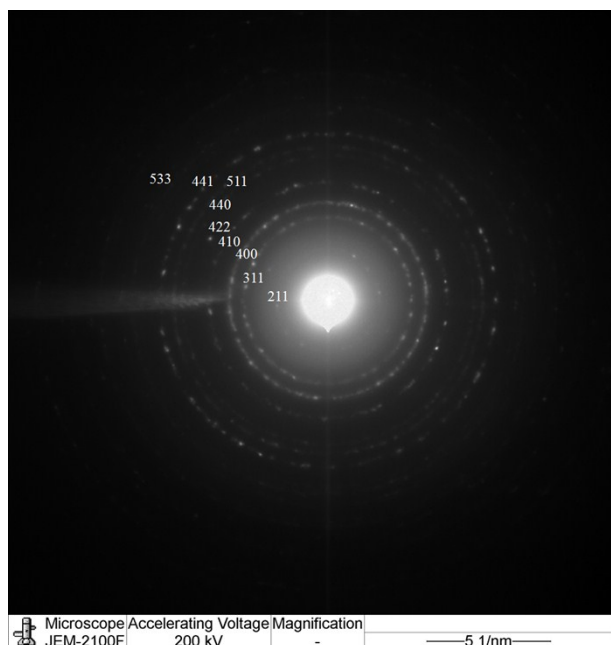

**Fig. S3** Electron diffraction patterns of  $\gamma$ -Fe<sub>2</sub>O<sub>3</sub>@SiO<sub>2</sub>.

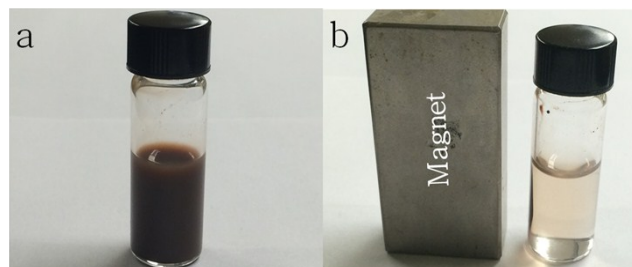

**Fig. S5**  $\gamma$ -Fe<sub>2</sub>O<sub>3</sub>@SiO<sub>2</sub>@Au NPs solution (a) before and (b) after adsorption and separation by a magnet.

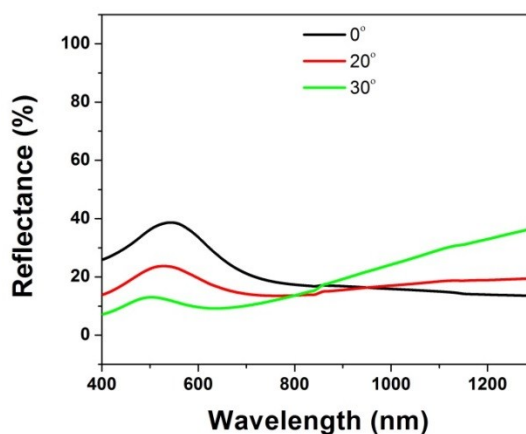

**Fig. S6** Measured transmission spectra of  $\gamma$ -Fe<sub>2</sub>O<sub>3</sub>@SiO<sub>2</sub>@Au ellipsoids in a magnetic field with different angles along their longitudinal direction.
